# Supplementary material for: Formation mechanism of basalt-related agate deposits: an example from the Ating River alluvial gravels in the Xunke area, Heilongjiang, NE China
Source: Frontiers journal article supplement (doi:10.3389/feart.2025.1548167), 2025-05-02
Supplement: Table_1.xlsx [file Table_1.xlsx]

## Sheet: Sheet1
TEXTURE	sampleName	Li (ppm)	Na (ppm)	Mg (ppm)	Al (ppm)	P (ppm)	K (ppm)	Ca (ppm)	Sc (ppm)	Ti (ppm)	Cr (ppm)	Mn (ppm)	Fe (ppm)	Ni (ppm)	Cu (ppm)	Zn (ppm)	Ga (ppm)	Ge (ppm)	Rb (ppm)	Sr (ppm)	Y (ppm)	Zr (ppm)	Sb (ppm)	Cs (ppm)	Ba (ppm)	La (ppm)	Ce (ppm)	Pr (ppm)	Nd (ppm)	Sm (ppm)	Eu (ppm)	Gd (ppm)	Tb (ppm)	Dy (ppm)	Ho (ppm)	Er (ppm)	Tm (ppm)	Yb (ppm)	Lu (ppm)	Hf (ppm)	Ta (ppm)	Pb (ppm)	Th (ppm)	U (ppm)
Cryptocrystalline	BH2-1	0.9395	323.8	6.068	564.2	17.25	315.5	54.03	0.6624	1.002	0.4374	4.964	719.6	2.206	0.3033	0.5517	0.211	13.63	1.774	0.9647	0.4775	0.8752	0.759	0.0772	3.147	0.09235	0.2104	0.04201	0.1092	0.04807	0.004163	0.05249	0.01245	0.05804	0.02368	0.1036	0.01811	0.1194	0.01411	0.01435		0.5433	0.01391	0.4981
Cryptocrystalline	BH2-2	0.6786	288.4	5.373	410.1	30.96	257	118.2	0.6885	0.7091	0.3715	6.313	575.3	0.9335	0.07832	0.6513	0.1816	13.28	1.386	0.698	0.4113	0.4229	1.029	0.08627	2.092	0.08142	0.1743	0.0443	0.1142	0.04397	0.007838	0.00922	0.00479	0.04405	0.008868	0.05204	0.004268	0.01562	0.004762	0.00451	0.001817	0.4462	0.001922	0.5835
Cryptocrystalline	BH2-3	0.5219	226.3	7.79	360	28.63	247.7	87.13	0.7276	1.28	0.5251	1.271	1356	1.988	0.35	6.174	0.2017	12.97	1.402	0.8851	0.466	0.7928	1.527	0.03764	2.577	0.1591	0.3345	0.07447	0.2339	0.06407	0.008963	0.03493	0.004158	0.07933	0.01546	0.0932	0.01538	0.1559	0.02253	0.008416	0.08247	0.8879	0.01156	1.85
Cryptocrystalline	BH2-4	0.388	120.3	10.79	60.18	37.31	123.8	19.08	0.7513	0.7479	0.7248	0.37	558.1	3.009	4.931e-17	2.503	0.17	7.972	0.6187	0.3765	0.1257	0.2484	0.802	0.03077	0.9325	0.05216	0.08243	0.01586	0.07342	0	0.009115	0.042		0.03727	0.005077	0.01956	0.001863	0.01468	0.01351		0.003343	0.2402	0.01475	0.6295
Crystalline	BH2-5	0.4001	45.41	1.79	24.6	48.09	29.72	32.99	0.515	0.6993	1.205	0.2614	10.8	6.405	0.1747	7.248	0.208	8.959	0.1109	2.522	0.175	0.7054	0.5803	0.1063	0.2186	0.01014	2.092	0.006397	0.03461	0.05367	0.00673	0.3502	0.07263	0.07895		0.004563	0.003093	0.02172	0.005766	0.005303	0.002932	0.04655	0.009772	0.9313
Crystalline	BH2-6	0.5282	11.23	0.3846	0.5324	32.44	0.2583	47.74	0.5193	0.6489	0.9222	0.4614	7.03	2.701	0.07566	0.4096	0.2068	2.833	0.166	0.018		0.03479	0.394	0.06049	0.02235			0.006103	0.06429	0.02514			0.001735	0.006503					0.001501			0.01095	0.001684	0.0594
Cryptocrystalline	BH2-7	0.4516	105.1	10.75	144.8	52.84	80.55	58.24	0.7205	1.109	0.5722	0.8622	184.5	2.558	0.1847	337.1	0.3194	3.018	0.4762	0.6113	0.2158	1.415	0.457	0.05991	1.346	0.04717	0.0651	0.02707	0.05641	0.08261	0.008529	0.01949	0.01422	0.04095	0.0135	0.04084	0.01311	0.08015	0.02787	0.01085		3.395	0.001249	0.4297
Crystalline	BH2-8	0.4049	87.99	6.994	1.682	55.66	29.17	36.07	0.6097		1.471	0.7806	23.65	6.401	0.3914	1.581	0.2585	3.64	0.3926	0.2884	0.243	0.3978	0.4545	0.131	0.149	48.2	0.01968	0.002568	0.01871	0.019			0.005121	0.00979	0.004951	0.02832	0.002401	0.07523	0.01293			0.02734	0.002551	0.4064
Crystalline	BH2-9	0.6276	35.21	0.3166	0.03616	42.63	12.62	55.17	0.5655	0.6202	1.141	0.3208	6.695	1.362	0.01841	0.9958	0.1707	3.409	0.2333	0.1718	0.1108	0.006009	0.06383	0.04023	0.03839		0.00685	0.004279				0.009708	0.004579	0.01987	0.003293	0.00998		0.0273	0.009343		0.01544	0.01794	0.00685	0.1679
Colloform	BH2-10	0.05108	169.9	3.208	34.34	60.73	97.8	35.42	0.4347	1.38	0.6585	7.592	109	2.727	0.1815	8.213	0.1627	14.95	0.239	0.2497	0.6261	0.1472	1.273	0.06941	0.6271	0.02902	0.03303	0.011	0.03327	0.01556			0.01405	0.05598	0.008735	0.04851	0.01018	0.07968	0.0144	0.0328	0.001928	0.1574	0.00107	1.289
Fibrous	BH2-11	0.2951	112.3	10.94	12.86	30.62	117.1	14.43	0.4244	1.293	1.343	0.6524	423.4	2.988	0.2557	3.143	0.2306	6.366	0.7323	0.1656	0.259	0.2846	1.568	0.07044	0.6088	0.008302	0.009693	0.009389	0.02108	0.05255	0.01775		0.002345	0.04093	0.003697	0.08807	0.01442	0.1423	0.02523	0.008299	0.006536	3.131	0.01486	0.8927
Fibrous	BH2-12	0.5379	164.8	3.247	35.64	24.81	105	34.31	0.6819	0.51	0.6851	5.999	130.5	2.292	0.5526	14.03	0.1629	12.45	0.4475	0.2549	0.3347	0.241	1.567	0.09368	0.9318	0.01283	0.05405	0.003988	0.02146	0.0106	0.003178		0.007004	0.07151	0.008564	0.01488	0.02422	0.01689	0.003265	0.009752	0.001087	0.15	0.00261	0.6637
Fibrous	BH2-13	0.4327	181.4	3.232	71.33	28.24	116.1	105.2	0.5248	0.5995	0.4098	5.979	191.3	0.1057	0.2331	0.7307	0.4243	13.32	0.5559	0.3912	0.3033	0.08379	1.778	0.04026	0.8167	0.04487	0.05425	0.006979	0.08639	0.01956	0.003599	0.003879	0.004578	0.04038	0.008867	0.0326		0.02217	0.007588	0.005302	0.003643	0.14	0.0005824	0.8445
Fibrous	BH2-14	0.08064	192.1	2.904	144.3	17.76	135.5	75.69	0.8621	0.7448	1.148	7.057	257.4	0.3722	0.1495	0.7355	0.3872	14.54	0.5455	0.4804	0.375	0.1044	1.674	0.06566	1.51	0.0496	0.07317	0.02249	0.1306	0.02871		0.07388	0.006991	0.08731	0.01112	0.06358	0.006651	0.02618	0.007112			0.1676	0.002599	0.8586
Fibrous	BH2-15	0.2128	236.4	4.654	233.4	27.66	192.4	77.38	0.9536	0.9439	0.4306	6.138	472.8	0.9728	0.1784	0.2817	0.2013	14.9	0.6998	0.5403	0.5537	0.2111	2.242	0.06051	2.778	0.09127	0.1795	0.04626	0.1632	0.03551	0.006991	0.04282	0.01211	0.07016	0.02469	0.04735	0.007853	0.03095	0.006333	0.01871		0.3323	0.003664	0.622
Fibrous	BH3-1	0.172	134.4	8.637	188.3	22.59	61.24	186.7	1.169	1.006	1.499	0.8395	153	0.9743	3.86	24.75	0.1908	4.217	0.1682	0.393	0.5907	0.712	0.7004	0.04256	2.304	0.04391	0.0889	0.05017	0.1306	0.117	0.006922	0.0211	0.003757	0.07764	0.01226	0.07108	0.001349	0.06901	0.01026	0.002502	0.002144	0.09888	0.006908	1.539
Micro-granular	BH3-2	0.6247	165.2	4.341	258.3	13.9	124.4	115.4	2.169	2.139	0.08328	2.637	64.03	4.647	3.273	50.85	0.1571	1.009	0.4915	0.2764	0.3774	0.4991	0.09141	0.06326	1.189	0.04165	0.5536	0.009804	0.09309	0.1394	0.0008933	0.005954	0.03358	0.05308	0.00557	0.1138	0.005993	0.07558	0.01252	0.01971	0.005358	1.721	0.008157	0.155
Fibrous	BH3-3	0.5508	105.2	7.024	119.6	35.88	55.05	119.4	3.169	0.6311	1.848	1.483	61.96	1.476	3.052	6	0.2143	3.296	0.1801	0.3726	0.4298	1.594	0.3374	0.05834	1.706	0.04048	0.09788	0.02834	0.1085	0.1186	0.003274	0.01788	0.01627	0.06845	0.01017	0.02789	0.06918	0.04148	0.009258	0.07231	0.001868	0.1336	0.0386	0.1424
Fibrous	BH3-4	0.2704	66.45	4.347	30.09	36.67	30.57	97.53	4.169	1.364	7.132	1.876	12.33	3.525	2.417	1.672	0.1771	2.759	0.1401	0.1893	0.2302	0.03012	0.1311	0.06456	0.5029	0.01128	0.05967	0.01172	0.04159	0.04273	0.003125		0.002182	0.01738	0.00743	0.02237	0.002516	0.05807	0.002362	0.01091	0.002191	0.5009	0.002692	0.1098
Fibrous	BH3-5	0.5216	59.08	3.498	30.95	39.69	26.7	72.19	5.169	1.655	0.2718	1.931	12.72	6.368	2.201	4.848	0.1609	2.296	0.174	0.1658	0.2083	0.316	0.04004	0.04765	0.3952	0.006366	0.05474	0.01167	0.05826	0.02964	0.001647	0.01864	0.006639	0.006278	0.01893	0.01595	0.002327	0.009952	0.001265		0.00116	0.1427	0.002668	0.09104
Fibrous	BH3-6	0.1542	76.72	5.07	30.23	21.88	28.67	89.31	6.169	1.309	2.423	0.3723	20.67	5.286	2.484	12.04	0.1114	2.806	0.1759	0.1831	0.1872	1.905	1.849	0.02994	0.4037	0.01462	0.06099	0.00746	0.07488	0.07817	0.002975	0.02342	0.001327	0.02541	0.02134	0.01565	0.01698		0.007505		0.04218	0.1435	0.005222	0.1151
Micro-granular	BH3-7	0.355	128.1	4.863	0.7615	32.48	40.97	75.32	7.169	2.401	2.45	2.778	21.06	5.076	0.915	4.699	0.1294	2.766	0.1387	0.2708	0.182	0.09027	0.1704	0.04306	0.4033	15.42	0.04059	0.02124	0.1064	0.07042	0.003934	0.01636	0.007683	0.03317	0.02244	0.01572	0.006914	0.02319	0.01511	0.002765	0.002475	41.26	0.005739	0.1093
Fibrous	BH3-8	0.4065	74.11	3.236	5.763	42.87	34.27	13.41	8.169	1.042	1.399	1.993	10.45	3.019	1.561	12.04	0.2176	2.677	0.1019	0.1494	0.2098	2.644	0.206	0.03407	0.1253	0.1909	0.04605	0.007168	0.03497	0.1303			0.003296	0.0631	0.007412	0.004488	0.003782	0.006873	0.00339	0.1777	0.01575	0.1282	0.01003	0.0642
Crystalline	BH3-9	0.4627	25.12	1.186	1.376	20.52	4.055	58.72	9.169	3.01	1.331	3.965	28.9	1.567	0.8274	17.56	0.1828	0.562	0.03263	0.2609	0.07387	0.05138	1.186	0.03098	0.7871	9.2	0.0202	0.009002	0.06744	0.07938		0.01862	0.01075	0.0704	0.001875	0.004205	0.04277	0.05269	0.008664	0.71	0.005732	0.06831	0.02492	0.009932
Fibrous	BH3-10	0.3379	75.98	3.593	7.599	42.93	32.33	121	10.169	1.336	1.126	3.056	15.66	11.52	1.96	1.888	0.1442	3.476	0.1935	0.1572	0.2187	2.409	0.08234	0.04247	0.3748		0.05312	0.001511	0.09226	0.05619		0.006259	0.02771	0.02351	0.008496	0.01431	0.01157		0.009339	0.004676		2.468	0.001796	0.06713
Micro-granular	BH3-11	0.4008	88.18	3.653	1.518	41.64	30.16	137.3	11.169	1.225	0.7067	2.813	70.64	23.07	1.491	42.77	0.2008	2.077	0.08942	0.1944	0.1677	6.474	0.5012	0.07948	0.0198	0.03881	0.04257	0.02453	0.07083	0.1337	0.00989	0.01302	0.00876	0.02833	0.003662	0.00882	0.001573	0.03794	0.003902	0.09446	0.04398	0.09901	0.01365	0.06251
Fibrous	BH3-12	0.3161	63.29	5.417	24.76	33.32	30.85	56.1	12.169	0.5563	0.9383	2.457	17.22	9.948	2.095	23.79	0.3583	2.054	0.05754	0.1588	0.2108	0.7235	0.1447	0.08473	1.173	0.01041	0.03793	0.01111	0.1089	0.07994	0.002107	0.0406	0.004199	0.01098	0.003957	0.01572			0.003918	0.01052	0.001071	0.3732	0.03924	0.08381
Micro-granular	BH3-13	0.2063	79.96	4.046	22.39	9.653	42.1	57.02	13.169	0.981	1.753	1.979	12.13	10.46	2.845	1.731	0.1385	2.223	0.1407	0.2269	0.2019	1.155	0.1934	0.07514	0.4413	0.01234	0.05135	0.02071	0.05758	0.04185	0.00719		0.003281	0.02764	0.007072	0.02299	0.03179	0.07279	0.01912	0.01022	0.01396	0.3257		0.1192
Fibrous	BH3-14	0.1777	96.45	6.426	97.13	37.48	66.9	99.2	14.169	0.6662	1.966	1.917	68.52	1.768	2.602	18.2	0.1769	2.68	0.07269	0.3202	0.4827	1.632	0.07407	0.07086	1.126	0.007508	0.08669	0.01151	0.06499	0.01693	0.004417	0.03655	0.0102	0.03751	0.003714	0.05162	0.006226	0.05631	0.006654	0.02015		0.2113		0.1421
Micro-granular	BH3-15	0.3219	136.5	6.843	175.3	56.91	108.9	85.11	15.169	0.4806	1.572	2.953	70.3	16.99	3.428	6.552	0.2324	3.471	0.2743	0.3879	0.4958	3.779	0.1522	0.07991	1.719	0.03369	0.1045	0.1008	0.0742	0.05998			0.004707	0.05255	0.01251	0.03961	0.01339	0.05137	0.009009	0.07376	0.002955	0.1888	0.007655	0.1454
Micro-granular	BH3-16	0.9673	167.3	8.016	278.6	42.86	134.7	27.9	16.169	0.5172	1.941	3.321	161.2	6.577	3.388	11.75	0.2276	2.589	0.4245	0.5604	0.5218	2.145	0.1525	0.07962	3.555	0.07083	0.1589	0.01805	0.1251	0.06662	0.003899	0.02381	0.003477	0.05298	0.02395	0.04761	0.01533	0.06435	0.01429	0.03241		0.1579	0.01918	0.1359
Fibrous	BH3-17	0.4691	166.9	8.681	274.1	46.14	137.1	115.9	17.169	0.4556	1.62	2.697	109.9	13.75	4.23	20.78	0.3137	2.991	0.7084	0.545	0.5881	0.9875	0.2251	0.06925	3.734	0.04334	0.2064	0.02322	0.4575	0.09034	0.01052	0.1001	0.05205	0.09345	0.003755	0.01474	0.02499	0.02641	0.03629	0.02789	0.004781	0.123	0.004935	0.3033
Fibrous	BH3-18	1.73	346.7	10.75	770.7	6.608	353.6	133.1	18.169	2.506	0.8593	3.911	267.4	8.921	2.583	85.1	0.1905	3.73	1.391	0.8399	0.5137	4.546	0.6239	0.1238	7.131	0.07859	0.2384	0.0478	0.1844	0.0655	0.332	0.03991	0.01004	1.294	0.03587	0.05804	0.01771	0.1296	0.02315	0.05396	0.004408	0.1908	0.01274	0.2411
Fibrous	BH3-19	1.384	258.6	10.43	595.1	88.77	251	127.1	19.169	1.132	2.009	3.539	290.8	3.891	3.104	9.191	0.3292	3.087	1.053	0.9884	0.4653	4.445	0.16	0.07994	7.769	0.06909	0.2097	0.04202	0.1363	0.405	0.001707	0.02086	0.00464	0.04915	0.01157	0.08558	0.009728	0.07058	0.00342	0.003013	0.001728	0.1865	0.00331	0.2903
Fibrous	BH3-20	0.5619	224.6	12.02	434.7	54.42	170	166.2	20.169	0.9329	1.494	1.674	204.8	6.761	3.479	6.658	0.2991	4.161	0.8429	0.7256	0.5697	3.193	0.07367	0.0722	4.932	0.07917	0.1555	0.03035	0.1399	0.07655	0.0172	0.07472	0.02486	0.02909	0.008351	0.07722	0.01367	0.08441	0.01009	0.08955	0.002059	0.1753	0.005748	0.6041
Fibrous	BH3-21	0.1761	132.9	6.085	183.1	39.82	79.56	204.1	21.169	1.025	1.432	2.293	95.41	1.993	3.658	3.491	0.4895	3.042	0.3189	0.3693	0.5224	6.361	0.05351	0.052	2.019	0.05917	0.09711	0.02396	0.07707	0.0492	0.005076	0.0331	0.01036	0.05078	0.01147	0.008339	0.01285	0.049	0.005993	0.004735		0.2194	0.005115	1.541
Fibrous	BH3-22	0.7236	109.4	5.777	135	3.785	80.13	79.54	22.169	6.703	1.968	1.233	68.63	12.16	2.747	7.919	0.2337	2.873	0.2548	0.3005	0.5297	1.136	0.2034	0.1008	1.284	0.0605	0.09814	0.02467	0.08872	0.06707	0.01128	0.05175	0.003406	0.03527	0.01284	0.1313	0.01831	0.006531	0.009348	0.01607	0.004462	0.3205	0.2114	1.047
Fibrous	BH3-23	0.3715	86.9	5.22	129.1	82.72	67.01	47.47	23.169	0.7367	1.684	1.335	115	43.83	3.833	39.84	0.1973	3.003	0.1149	0.3233	0.4393	11.1	0.3897	0.09304	1.469	0.07187	0.1073	0.02606	0.02632	0.0386	0.005457	0.04297	0.005857	0.05412	0.01499	0.0209	0.004209	0.01331	0.009053		0.005944	0.1111	0.003289	1.032
Fibrous	BH3-24	0.4255	137.4	5.837	152.9	24.06	102.6	70.51	24.169	0.7123	0.9945	4.064	757.7	15.45	3.188	7.2	0.275	4.219	0.2089	0.2563	0.6898	3.837	1.061	0.04774	1.538	0.207	0.4476	0.0523	0.3845	0.1406	0.03158	0.07114	0.2031	0.05557	0.02496	0.05705	0.01057	0.04808	0.01493	0.01651	0.04693	0.9251	0.01801	1.274
Cryptocrystalline	BH3-25	0.5776	132.2	5.557	161.7	39.48	93.32	59.68	25.169	1.224	0.9497	1.332	147	4.894	2.948	6.328	0.1877	5.034	0.07733	0.3089	0.4857	3.571	0.1099	0.08535	1.124	0.04081	0.1197	0.03414	0.076	0.06026	0.009066	0.06563	0.0093	0.03734	0.02163	0.04251	0.008465	0.1983	0.02466	0.1778	0.01745	0.2002	0.01407	0.963
Cryptocrystalline	BH3-26	0.4988	136.6	5.038	157.2	51.96	91.85	129.6	26.169	0.7964	1.071	2.76	825.8	2.006	4.048	12.36	0.3696	5.36	0.4054	0.1937	0.5978	0.9788	0.08867	0.04393	1.673	0.1912	0.4704	0.0705	0.3832	0.1175	0.01932	0.08337	0.01104	0.1516	0.01494	0.06608	0.007364	0.06275	0.01431	0.06355	0.01427	1.305	0.005834	1.395
Colloform	BH4-1	1.464	112.8	23.4	205.3	22.66	182.2	308.6	1.081	1.182	0.2931	3.906	4635	1.072	1.529	1.036	0.3811	4.931	0.5744	1.379	0.1791	2.945	1.002	0.03287	10.69	0.1491	0.3036	0.04824	0.2023	0.03563	0.01849	0.05316	0.007072	0.0541	0.008793	0.03197	0.003106	0.02812	0.003638	0.0256		0.1978	0.001392	0.09034
Cryptocrystalline	BH4-2	1.512	109.7	19.27	174.9	3.402	181	291.5	1.05	0.7538	0.3823	0.6979	620.9	0.4559	1.484	1.008	0.2777	5.765	0.6121	1.101	0.0272	3.25	0.5668	0.02388	3.279	0.01418	0.02718	0.001773	0.01248	0.01104	0.000702	0.003233	0.001666	0.003936	0.0004265	0.001894	0.001846	0.001702	0.001586	0.03646	0.001903	0.1103	0.003258	0.06315
Fibrous	BH4-3	0.6372	94.81	14.56	122.3	17.95	154.6	200.4	0.7829	0.6494	3.038	0.6522	166.5	0.1236	0.4435	0.6018	0.2547	5.908	0.5187	0.5936	0.005173	0.7625	0.7558	0.02128	0.5655	0.00613	0.009027	0.005292	0.01802	0.01055	0.007924	0.01021	0.00371	0.004012	0.01009	0.006924	0.004009	0.004636	0.009617	0.03024	0.004578	0.242	0.002635	0.04775
Colloform	BH4-4	2.381	140.1	17.71	257.8	17.2	242.5	227.7	0.9163	1.088	2.543	0.7391	387.2	0.1646	0.6185	0.602	0.3242	5.527	0.8866	0.8706	0.03803	1.196	1.226	0.03869	1.016	0.01993	0.0211	0.01532	0.02371	0.01593	0.01374	0.01957	0.005362	0.01231	0.005948	0.001989	0.001305	0.06538	0.005228	0.02524	0.02551	0.3091	0.0115	0.04426
Cryptocrystalline	BH4-5	0.8307	139.3	16.29	191	19.98	200.2	143.9	0.556	1.964	0.8956	0.6126	100.1	0.2987	0.1745	3.469	0.2456	5.345	0.8253	0.8887	0.02159	0.4085	0.8825	0.03572	1.138	0.01767	0.01042	0.003942		0.02062	0.01072	0.008824	0.002086	0.01973	0.005086	0.02699	0.004113	0.005358	0.004993	0.03726	0.001023	0.9781	0.007147	0.03894
Fibrous	BH4-6	1.007	131.8	14.62	174.1	25.96	196.7	179.5	0.6615	1.175	0.4646	0.543	146.4	0.4005	0.1836	0.8718	0.2817	4.756	0.7274	0.8326	0.01345	0.3115	1.032	0.02375	0.9688	0.02852	0.006478	0.003534	0.0418	0.02277	0.005878	0.002602	0.01102	0.009622	0.01739	0.002386	0.004336	0.03121	0.005402	0.01544	0.007524	0.3819	0.0003307	0.02192
Fibrous	BH4-7	1.118	144.9	15.45	218.2	24.47	227.3	146.6	0.5365	1.525	2.329	0.8537	67.21	1.763	0.2354	2.722	0.2227	5.449	0.895	0.7992	0.007903	0.2927	0.9733	0.03536	1.191	0.01269	0.02421	0.003317	0.01354	0.01068	0.005713	0.02147	0.0007877	0.02552		0.004575	0.01599	0.007991	0.003059	0.02318	0.00201	0.1827	0.006716	0.03028
Micro-granular	BH4-8	2.601	205.3	19.23	371	32.82	337.9	153.1	0.6812	1.275	1.852	1.151	144.7	0.3827	0.4242	1.798	1.293	2.132	1.673	0.9196	0.05625	0.5118	0.4599	0.06136	1.848	0.1898	0.03207	0.01786	0.05358	0.0209	0.01562	0.04163	0.03374	0.009484	0.006986	0.01278	0.01759	0.0405	0.07607	0.2362	0.06151	0.1029	0.03251	0.07697
Colloform	BH4-9	0.3506	89.14	14.33	57.14	21.67	120.6	96.37	0.5938	0.7449	71.33	0.8925	175.9	0.4971	1.683	2.132	0.4538	3.926	0.3709	0.5245	0.02227	0.158	0.8996	0.04019	0.5791	0.06291	0.02269	0.003978	0.02502	0.01457	0.00522	0.01312	0.003126		0.0007914	0.003888	0.002881	0.009128	0.004249	0.01536	0.001962	0.6319	0.001749	0.022
Colloform	BH4-10	0.291	103.6	17.07	94.6	21.46	133.9	43.75	0.5029	0.609	0.8587	1.065	264.9	0.2788	1.552	1.884	0.3239	4.062	0.547	0.6578	0.02621	0.1864	0.6791	0.02907	0.9325	0.02544	0.04298	0.0286	0.01199	0.01375	0.004524	0.02612	0.5628	0.01572	0.003656	0.01051	0.006288	0.01864	0.002696	0.002667	0.002441	0.09317	0.008549	0.02973
Fibrous	BH4-11	0.2156	101.5	14.5	65.25	26.32	128.1	111.2	0.5828	0.7883	53.87	0.7484	157.9	0.865	0.7506	7.947	0.2441	4.236	0.4723	0.5066	0.01921	0.1363	0.837	0.03087	0.6911	0.005323	0.08541	0.003423	0.008543	0.01433	0.005312	0.01786	0.003334	0.02449	0.005092	0.003553	0.007017	0.006208	0.003577	0.002731	0.005849	0.2693	0.01164	0.0218
Crystalline	BH5-1	0.1341	7.117	0.9013	1.74	2.574	4.951	83.66	0.3828	8.734	303	81.8	4.968	0.4644	0.3019	125.1	0.4506	0.01648	0.05689	3.259	0.06345	8.887	2.436	0.1472	0.1495	86.49	0.1478	0.0192	0.3779	0.2712	0.05052	0.05187	0.8455	0.01609	0.06208	0.07658	0.02648	0.06325	0.2804	2.857	0.06872	6.8	0.03004	0.1567
Cryptocrystalline	BH5-2	0.1405	17.38	4.74	11.66	24.33	60.68	27.49	0.55	2.663	1.107	0.4442	42.09	8.041	0.1508	5.531	0.09703	3.601	0.0984	0.3379	0.01944	0.2502	1.183	0.06888	0.3639	18.36	0.03001	0.004599	0.01078	0.01648	0.004075	0.006619	0.005794	0.003096	0.003364	0.001959	0.003357	0.02083	0.00621	0.03079	0.005159	15.28		0.08431
Micro-granular	BH5-3	0.8934	20.43	7.067	12.47	41.81	61.38	65.27	0.4498	3.129	15.02	0.4757	42.62	0.3593	0.1949	43.44	0.4756	1.555	0.2317	0.05168	0.02694	2.857	0.7596	0.3802	0.5725	19.14	1.214	0.007151	0.2376	1.251	0.02038	0.0223	0.01076	0.004855	0.01448	0.05206	0.1382	0.03536	0.008918	0.0374	0.01294	7.789	0.3134	0.07312
Colloform	BH5-4	0.02834	75.17	17.75	81.74	15.22	109.9	125.9	0.4829	0.4004	0.3077	1.142	293	2.819	0.2599	1.827	0.187	2.715	0.2624	0.3988	0.02512	0.6449	3.76	0.02585	0.7242	3.884	0.02275	0.01322	0.01141	0.02984	0.002638	0.01589	0.001951	0.0107	0.003319	0.001927	0.0006236	0.003114	0.00704	0.009525	0.001594	0.2781	0.001657	0.06345
Colloform	BH5-5	0.198	73.67	16.73	107.9	10.16	102.3	120.7	0.529	1.91	0.6935	2.775	951.3	0.3256	0.7031	1.348	0.1603	2.77	0.1946	0.4179	0.05188	0.6885	3.782	0.02533	0.9104	0.03539	0.07499	0.02027	0.02571	0.01895	0.001964	0.003357	0.001227	0.01399	0.003608	0.01124	0.003263	0.007984	0.003321	0.02688	0.01198	0.1769	0.004772	0.05091
Colloform	BH5-6	0.6315	77.1	18.51	142.4	37.28	104.1	174.5	0.5467	0.5535	0.4234	7.6	3904	1.059	1.368	1.924	0.1177	2.054	0.2495	0.7835	0.1756	0.8424	3.325	0.02162	3.225	0.1199	0.2628	0.03229	0.1004	0.05154	0.008589	0.06832	0.02061	0.05063	0.01322	0.02195	0.005858	0.02458	0.007441	0.009319	0.001287	0.1415	0.001504	0.06969
Crystalline	BH5-7	0.2811	8.43	0.273	0.9688	28	6.198	40.45	0.3904	0.4986	1.613	0.1117	69.82	19.03	0.4642	0.7628	0.1868	0.448	0.04636	0.3789	0.01209	0.7568	0.7993	0.05493	9.946	0.8128	0.0423	0.003791	0.01333	0.1106	0.01202	0.01429	0.0008726	0.0633	0.002995	0.004299	0.002118	0.008789	0.01641	0.01183	0.005479	1.766	0.0073	0.005659
Fibrous	BH5-8	0.1055	17.44	1.972	53.05	34.33	50.85	71.22	0.4554	3.164	1.371	0.1603	17.04	0.8846	0.2247	4.929	0.5155	2.425	0.154	0.7184	0.07973	0.2327	1.252	0.2308	22.31	26.05	0.1371	0.03634	0.07339	0.06085	0.07212	0.3911	0.004017	0.04598	0.002534	0.09776	0.06993	0.03115	0.0173	0.2048	0.06543	23.85	0.00929	0.09442
Crystalline	BH5-9	0.2115	6.344	0.1866	14.64	21.96	16.2	40.03	0.3976	3.491	0.4384	0.1568	1.202	3.113	0.04847	1.472	0.04943	0.7378	0.0254	0.3402	0.03216	4.835	0.5036	0.0278	0.4712	34.8	0.05991	0.007208	0.01449	0.006351	0.01891	0.005752	0.04804	0.003186	0.005713	0.03125	0.04961	0.006893	0.1351	0.6406		0.7117	0.006482	0.02424
Micro-granular	BH6-1	0.08761	76.47	12.81	10.97	30.96	98.26	41.99	0.3724	53.76	5.854	0.713	59.53	0.5415	0.4685	80.06	0.7452	1.249	0.2271	0.1933	0.07572	4.007	0.3408	0.0389	0.5922	6.572	0.1496	0.00479	0.01558	0.02399	0.01107	0.01065	0.01317	0.03756	0.02802	0.01741	0.01109	0.3901	0.04867	0.07952	0.01695	2.148	0.08511	3.372
Fibrous	BH6-2	0.2363	89.56	9.811	23.28	6.115	130.5	159.3	0.6509	0.468	11.43	1.84	1734	0.4141	0.244	0.2621	0.5873	1.753	0.2542	0.238	0.01356	0.0189	1.428	0.02024	1.478	0.004569	0.002784	0.002305	0.01024	0	0.004555	0.007103	0.003895	0.004029	0.0005381	0.008068	0.0104	0.004748	0.003361	0.007128	0.0008225	0.0442	0.001136	0.01689
Colloform	BH6-3	2.014	152.9	86.18	3823	20.08	244.1	801.6	1.245	418.5	3.94	10.05	1924	1.298	9.133	5.036	0.9101	1.869	0.6129	12.29	0.4111	15.19	1.574	0.03038	201	0.6891	1.792	0.1684	0.4375	0.1091	0.04012	0.2389	0.02701	0.1182	0.03055	0.09486	0.01275	0.0597	0.0311	0.2972	0.02009	1.556	0.3358	0.06882
Cryptocrystalline	BH6-4	0.2216	99.31	12.64	50.58	11.72	145.6	203.7	0.6231	1.795	0.475	1.494	1854	0.2459	0.2423	0.43	0.719	1.798	0.3131	0.4224	0.01975	0.1062	1.78	0.01476	4.913	0.009088	0.0244	0.002451	0.01202	0.0124	0.007105		0.002454		0.001615	0.001284	0.002623	0.0063	0.0002978	0.004691	0.002058	0.472	0.0003334	0.02647
Cryptocrystalline	BH6-5	0.2386	101.1	11.56	44.45	2.349	140.8	141.7	0.6224	0.4231	0.3383	1.836	1923	0.1959	0.1266	0.3244	0.6677	1.95	0.274	0.3525	0.01499	0.08562	1.481	0.01564	2.65	0.009724	0.01737	0.002809		0.007064	0.004484	0.005882	0.001339	0.001269		0.004833	0.001026	0.007728	0.002993	0.001074		0.1157	0.001837	0.02829
Cryptocrystalline	BH6-6	0.3946	107.5	19.71	78.41	10.71	167.4	195.2	0.584	0.5494	0.1299	1.171	512.9	0.179	0.636	0.318	0.5007	2.043	0.4132	0.5588	0.01329	0.178	1.415	0.01808	0.7757	0.007799	0.01712	0.000943	0.01518		0.00437	0.013	0.000605	0.00549	0.001394	0.007901		0.005374	0.003259	0.00195	0.001098	0.094	0.0009671	0.02779
Colloform	BH6-7	1.152	132.4	21.11	190.5	18.07	217.7	151.8	0.6	0.3607	0.2845	1.026	419.2	0.5404	0.02668	0.7018	0.3579	1.527	0.5808	0.5869	0.01772	0.5002	1.092	0.03582	1.344	0.006233	0.01394	0.001451	0.03598	0.01676	0.004618	0.019	0.002472	0.006485		0.004821	0.0003383	0.009792	0.00439	0.01661	0.01444	1.782	0.002423	0.02664
Fibrous	BH6-8	0.2766	93.08	12.14	91.31	13.33	153	116.4	0.5108	0.4416	0.2228	0.8544	220.7	0.4138	0.01143	0.7892	0.5198	0.2409	0.3833	0.2771	0.003425	0.1817	0.2342	0.02542	1.146	0.01894	0.0006207	0.001222	0.02828	0.003396	0.009037	0.005466	0.0007778		0.05851	0.008167	0.0003695	0.01845	0.002079	0.003702	0.0009732	0.124	0.001257	0.02568
Micro-granular	BH6-9	0.5684	108	22.81	132.5	9.604	174.6	173.6	0.6111	0.6337	1.224	1.387	687.4	0.4032	0.2228	1.405	0.4036	2.13	0.4714	0.6344	0.02941	0.548	1.613	0.02842	1.173	0.006846	0.02129	0.007485	0.02061	0.0112	0.00382	0.008102	0.005512	0.01407	0.003471	0.04165	0.001192	0.01534	0.001072	0.005463	0.003613	0.08359	0.003431	0.02995
Colloform	BH6-10	0.9149	130.4	20.89	208	13.33	230.2	208.4	0.6132	1.286	0.3397	1.393	467.6	0.4218	0.2395	12.42	0.5367	1.372	0.5572	0.6057	0.02689	0.9241	1.37	0.03717	1.207	0.05055	0.03789	0.004808	0.01865	0.01629	0.005248	0.05239	0.001703	0.00389	0.005852	0.008001	0.002695	0.0184	0.00447	0.008564	0.07342	0.2581	0.0515	0.03535
Micro-granular	BH6-11	0.5101	112.3	22.02	86.92	14.31	168.7	247.8	0.7211	0.4983	0.3748	1.322	569.6	0.4836	0.2007	2.847	0.4321	2.779	0.4339	0.6305	0.01695	0.3597	1.711	0.02381	1.221	0.006036	0.01016	0.001273	0.02721	0.008005	0.00977	0.008866	0.002085	0.01305	0.001508	0.00792	0.000801	0.01732	0.0008983		0.0008653	0.2195	0.003012	0.02731
Colloform	BH6-12	0.3774	111.6	25.75	94.15	2.855	172.6	258.5	0.6156	0.6579	0.3628	1.38	500.1	0.2401	0.2526	1.203	0.4102	1.98	0.4298	0.6484	0.01845	0.4193	2.212	0.02252	1.176	0.00643	0.01488	0.001655	0.015	0.006163	0.001881	0.008194	0.001034	0.008633	0.001467	0.002574	0.001156	0.01858	0.003309	0.0332	0.002371	0.1081	0.001266	0.03348
Colloform	BH6-13	0.274	109.9	24.67	65.48	0.592	151.1	207.5	0.4905	2.216	0.2875	1.169	364.5	0.878	0.2575	12.18	0.4312	2.774	0.3155	0.6504	0.01949	0.2509	1.957	0.03727	0.846	0.007912	0.006663	0.003153	0.04099	0.009131	0.008894	0.01965	0.005436	0.001889	0.001164	0.03207	0.002268	0.009331	0.004081	0.1295	0.002486	0.7075	0.02359	0.03353
Cryptocrystalline	BH6-14	0.1249	97.53	23.38	22.51	9.031	124.2	200.6	0.54	0.3116	5.027	0.8965	229.3	0.456	0.3601	2.111	0.2525	2.149	0.203	0.5576	0.01781	2.636	1.288	0.03119	0.7057	0.01829	0.01098	0.005073	0.007336	0.07622	0.01577	0.01445	0.006752	0.009543	0.00697	0.01016			0.005957	0.03645	0.008334	0.6285	0.002087	0.009413
Fibrous	BH6-15	0.3135	47.3	11.57	28.64	9.565	59.34	119.4	0.5263	1.607	0.3675	1.706	906.7	0.6278	0.7907	5.568	0.1967	1.23	0.09907	0.488	0.06825	0.2478	0.6019	0.01514	1.549	0.04073	0.07395	0.01091	0.03157	0.01454	0.004717	0.02451	0.00623	0.02834	0.06585	0.01785	0.005514	0.01217	0.007082	0.009606	0.007101	0.09267	0.00199	0.02709
Crystalline	BH6-16	0.8879	22.08	15.55	24.3	31.07	27.13	142	0.2874	5.198	2.258	0.5534	97.24	0.1106	0.7633	4.915	0.5654	2.876	0.1657	0.5578	0.1882	0.7282	2.196	0.4249	2.773	0.5384	0.5264	0.3794	1.003	0.8174	0.04468	0.1319	0.1033	0.2193	0.01359	0.07342	0.005611	0.04113	0.01418	0.7386		0.5013	0.05439	0.9152
*: " " means below detection limit
“Na (ppm)” measn These data were used as model validation data in the papers published by our research team. Zhang, P., Wang, B. C., Huang, X. W., & Xi, X. (2024). Geochemical Discrimination of Agate in Diverse Volcanic Host Rocks Through Machine Learning Methods. Minerals, 15(1), 32.
